# Supplementary material for: Engineering of the endogenous HBD promoter increases HbA2
Source: eLife. 2023 Jun 2;12:e85258. doi: 10.7554/eLife.85258 (PMC10270685; doi:10.7554/eLife.85258)
Supplement: Supplementary file 1. [file elife-85258-supp1.xlsx]

## Sheet: Sheet1
HBD IVT template
g1	GGATCCTAATACGACTCACTATAGCAGGACCAGCATAAAAGGCAGTTTTAGAGCTAGAA
g2	GGATCCTAATACGACTCACTATAGAGGTTGGTTTAAGATAAGCAGTTTTAGAGCTAGAA
g3	GGATCCTAATACGACTCACTATAGCAGGTTGGTTTAAGATAAGCGTTTTAGAGCTAGAA
g4	GGATCCTAATACGACTCACTATAGCTCTGCCCTGCCTTTTATGCGTTTTAGAGCTAGAA
g5	GGATCCTAATACGACTCACTATAGACAGGACCAGCATAAAAGGCGTTTTAGAGCTAGAA
Repair templates
K	TTCATTTTTCATTCTCACAAACTAATGAAACCCTGCTTATCTTAAACCAACCTGCTCACTGGAGCAGGGAGGACAGGACCAGCATAAAAGccacaccctGCAGGGCAGAGTCGACTGTTGCTTACACTTTCTTCTGACATAACAGTGTTCACTAGCAACCTCAAACAGACACCATGGTGCATCTGACTC
DT	GGAATAGTGGAATGAAGGTTCATTTTTCATTCTCACAAACTAATGAAACCCTGCTTATCTTAAACCAACCTGCTCACtGGAGCAGGGAGGGCAGGAGCCAGGGCTGGGCATAAAAGGCAGGGCAGAGTCGACTGTTGCTTACACTTTCTTCTGACATAACAGTGTTCACTAGCAACCTCAAACAGAC
KDT	GGAATAGTGGAATGAAGGTTCATTTTTCATTCTCACAAACTAATGAAACCCTGCTTATCTTAAACCAACCTGCTCACCACACCCTGGAGCAGGGAGGGCAGGAGCCAGGGCTGGGCATAAAAGGCAGGGCAGAGTCGACTGTTGCTTACACTTTCTTCTGACATAACAGTGTTCACTAGCAACCTCAAACAGAC
NGS primers
NGS forward	CTTTCCCTACACGACGCTCTTCCGATCTGAACAGCCAATCTCAGGGCAAG
NGS reverse	GGAGTTCAGACGTGTGCTCTTCCGATCT CAGGGCATTGACAGCAGTCTTCTC
qRT-PCR primers
GAPDH for	CAACAGCGACACCCACTCCT
GAPDH rev	CACCCTGTTGCTGTAGCCAAA
HBA for	GAGGCCCTGGAGAGGATGTTCC
HBA rev	ACAGCGCGTTGGGCATGTCGTC
HBB for	TGTCCACTCCTGATGCTGTTATG
HBB rev	GGCACCGAGCACTTTCTTG
HBD for	AACCTCAAGGGCACTTTTTCT
HBD rev	GGAAACAGTCCAGGATCTCAA
HBG for	CCTGTCCTCTGCCTCTGCC
HBG rev	GGATTGCCAAAACGGTCAC
ChIP qRT-PCR
ChIP HBB for	GGAGGGCTGAGGGTTTGAAGTCC
ChIP HBB rev	TGTCCTTGGCTCTTCTGGCACTG
ChIP HBD for	gggcaagttaagggaatagtggaatgaagg
ChIP HBD rev	gtcagaagaaagtgtaagcaacagtcgac
ChIP SP1 for	ACCTCTCCGCCCACTAGGA
ChIP SP1 rev	CAACGGCCAACCAGAATCC
ChIP VEGFA for	GGTTTGTATCCTGCCCTTCC
ChIP VEGFA rev	ACTGGGTCTTGCTGTTTTCC
